# Supplementary material
Source: Springer Nature journal article supplement (https://www.springermedizin.de/resource/supplementary/12885_2008_1569_MOESM9_ESM.pdf/9472344)

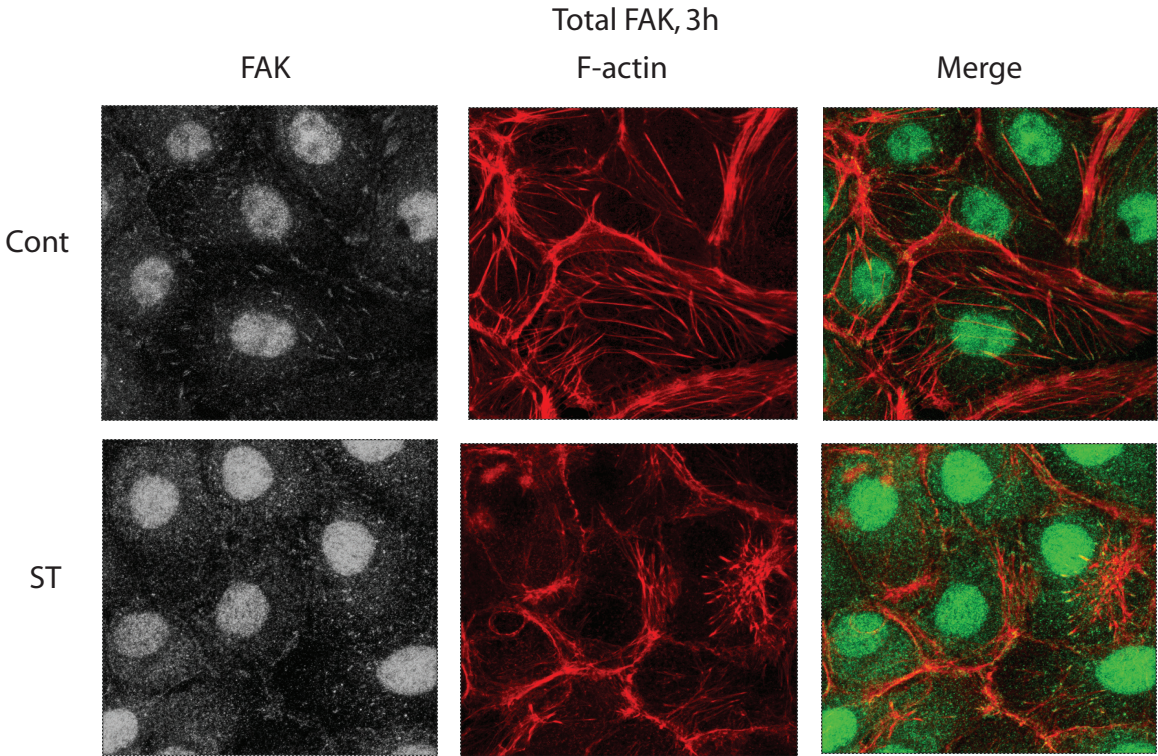

Supplementary figure 1

Supplement: MOESM9 [file 9472344]
